# Supplementary material for: An optimized model for ammonia/syngas combustion
Source: Royal Society of Chemistry journal article supplement (doi:10.1039/d3re00160a), 2023-01-01
Supplement: d3re00160a2.pdf [file d3re00160a2.pdf]

## Supplementary Material for

### An optimized model for ammonia/syngas combustion

Wenyu Li<sup>a,b</sup>, Chun Zou<sup>b,\*</sup> and Hong Yao<sup>b</sup>

<sup>a</sup>School of Mechanical Engineering, Nanjing University of Science and Technology, Nanjing  
210094, PR China

<sup>b</sup>State Key Laboratory of Coal Combustion, Huazhong University of Science and Technology,  
Wuhan 430074, PR China

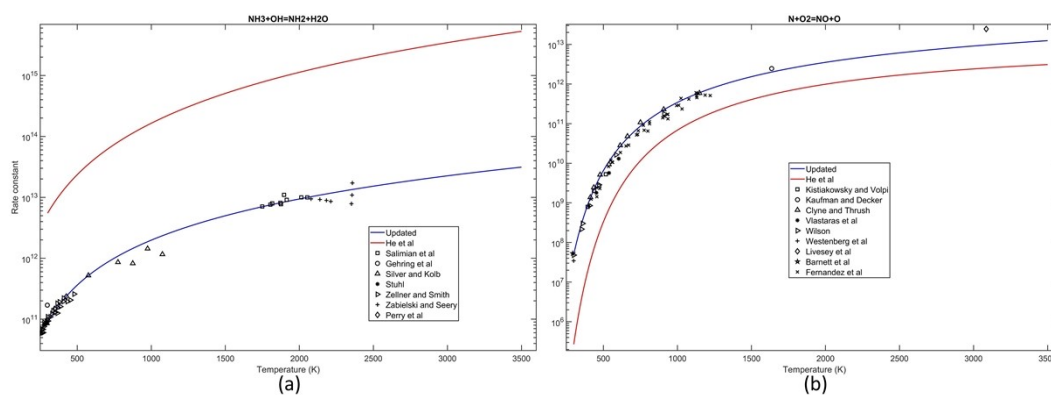

Figure S1. Rate constants of (a)  $\text{NH}_3 + \text{OH} = \text{NH}_2 + \text{H}_2\text{O}$  measured by Salimian et al. [1], Gehring et al. [2], Silver and Kolb [3], Stuhl [4], Zellner and Smith [5], Zabielski and Seery [6] and Perry et al. [7], and (b)  $\text{N} + \text{O}_2 = \text{NO} + \text{O}$  measured by Kistiakowsky and Volpi [8], Kaufman and Decker [9], Clyne and Thrush [10], Vlastaras et al. [11], Wilson [12], Westenberg et al. [13], Livesey et al. [14], Barnett et al. [15] and Fernandez et al. [16], and those predicted using the updated (blue) and original (red) rate parameters.

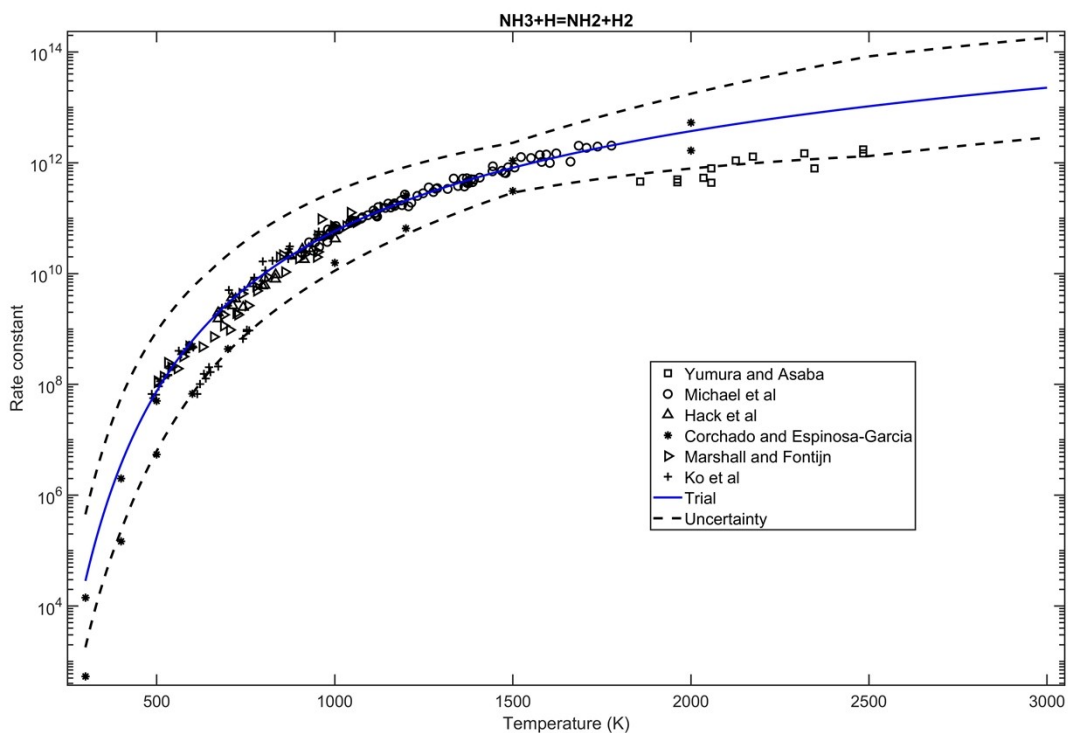

Figure S2. Rate constant of  $\text{NH}_3+\text{H}=\text{NH}_2+\text{H}_2$  in the trial model and the uncertainty factor estimated based on available experimental data of Yumura and Asaba [17], Michael et al. [18], Hack et al. [19], Corchado and Espinosa-García [20], Marshall and Fontijn [21] and Ko et al. [22].

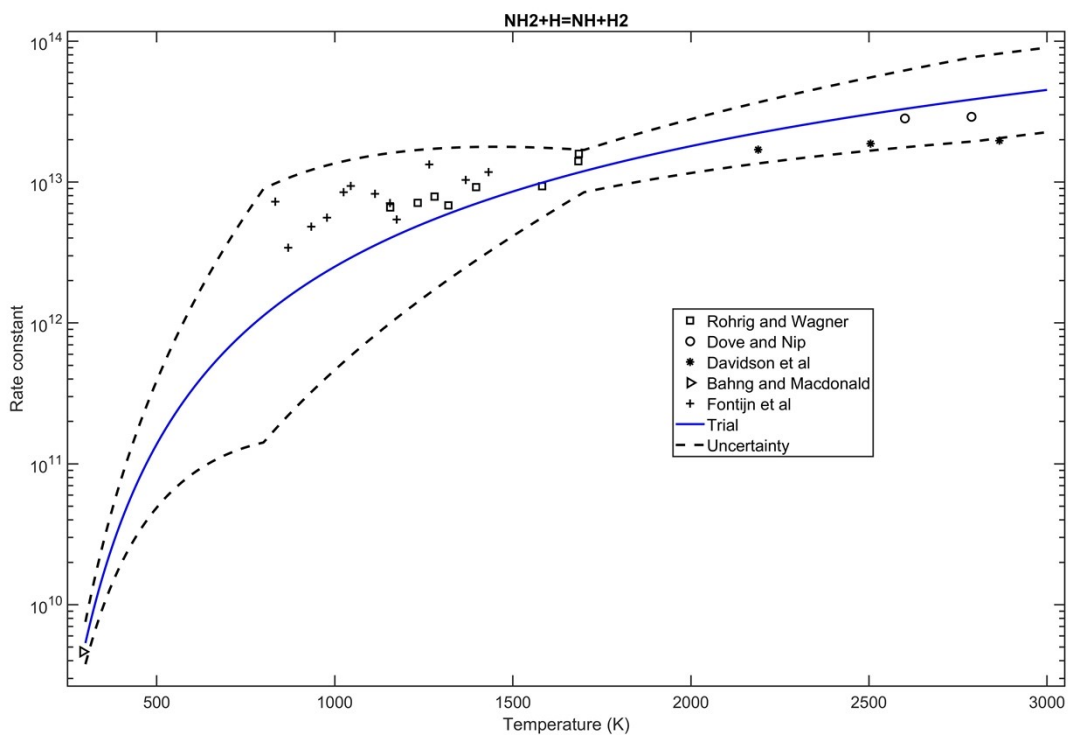

Figure S3. Rate constant of  $\text{NH}_2+\text{H}=\text{NH}+\text{H}_2$  in the trial model and the uncertainty factor estimated based on available experimental data of Röhrig and Wagner [23], Dove and Nip [24], Davidson et al.

al. [25], Bahng and Macdonald [26] and Fontijn et al. [27].

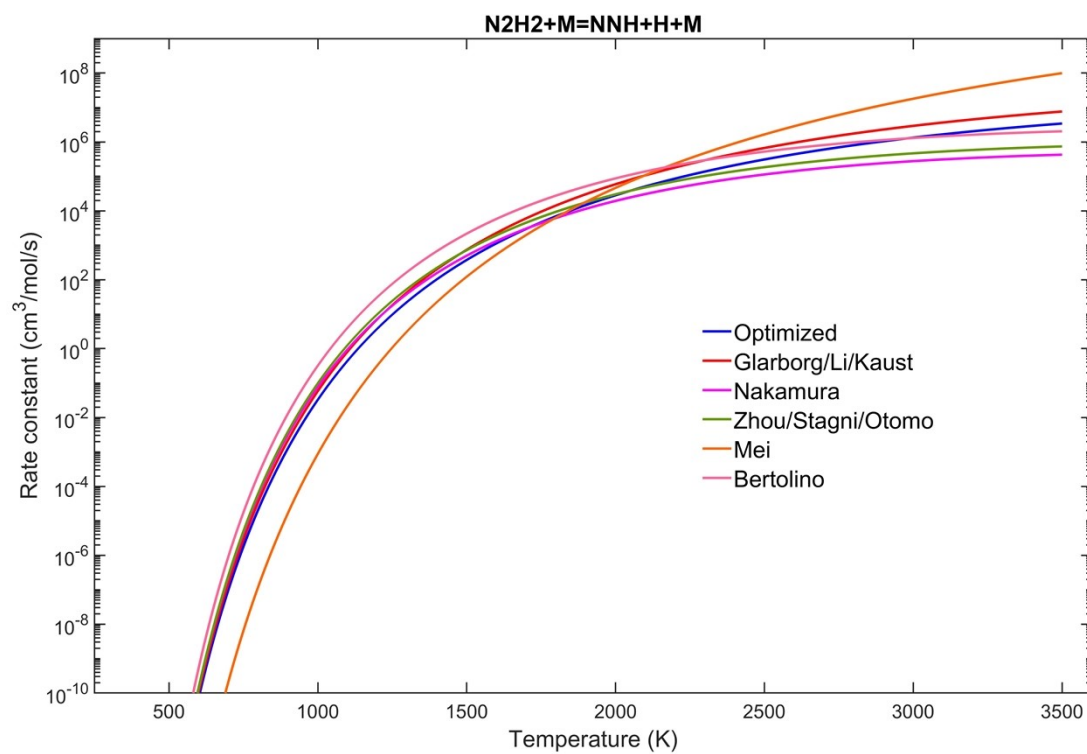

Figure S4. Rate constant of  $N_2H_2+M=NNH+H+M$  predicted using the investigated models.

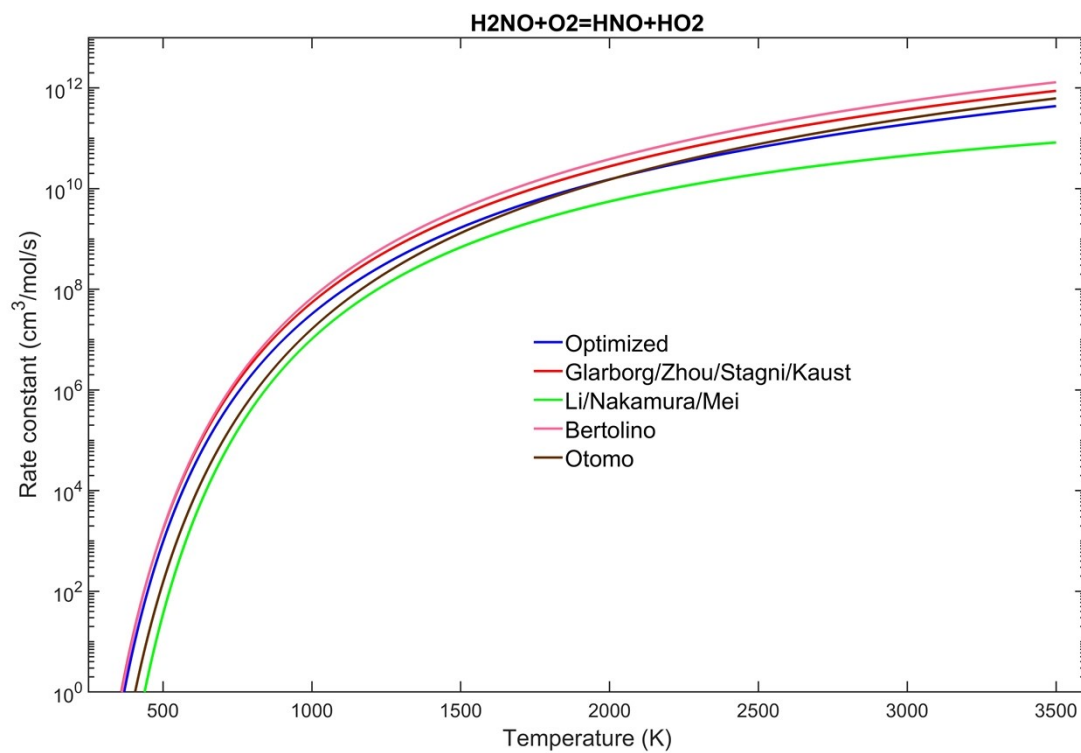

Figure S5. Rate constant of  $H_2NO+O_2=HNO+HO_2$  predicted using the investigated models.

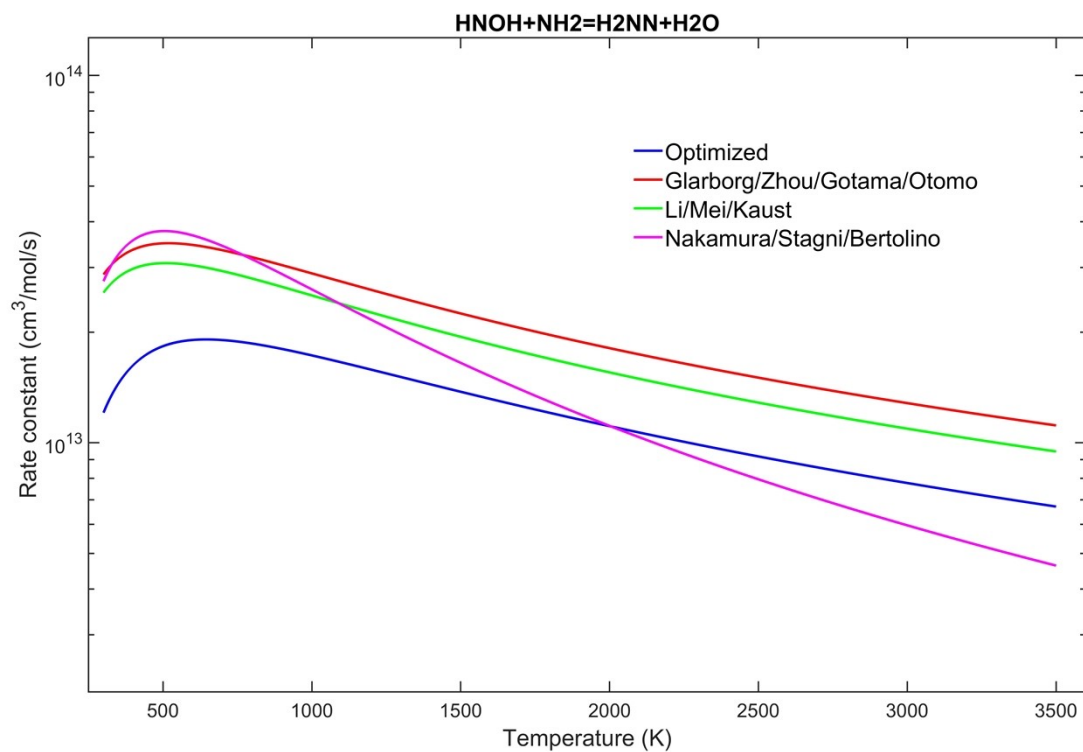

Figure S6. Rate constant of  $\text{HNOH}+\text{NH}_2=\text{H}_2\text{NN}+\text{H}_2\text{O}$  predicted using the investigated models.

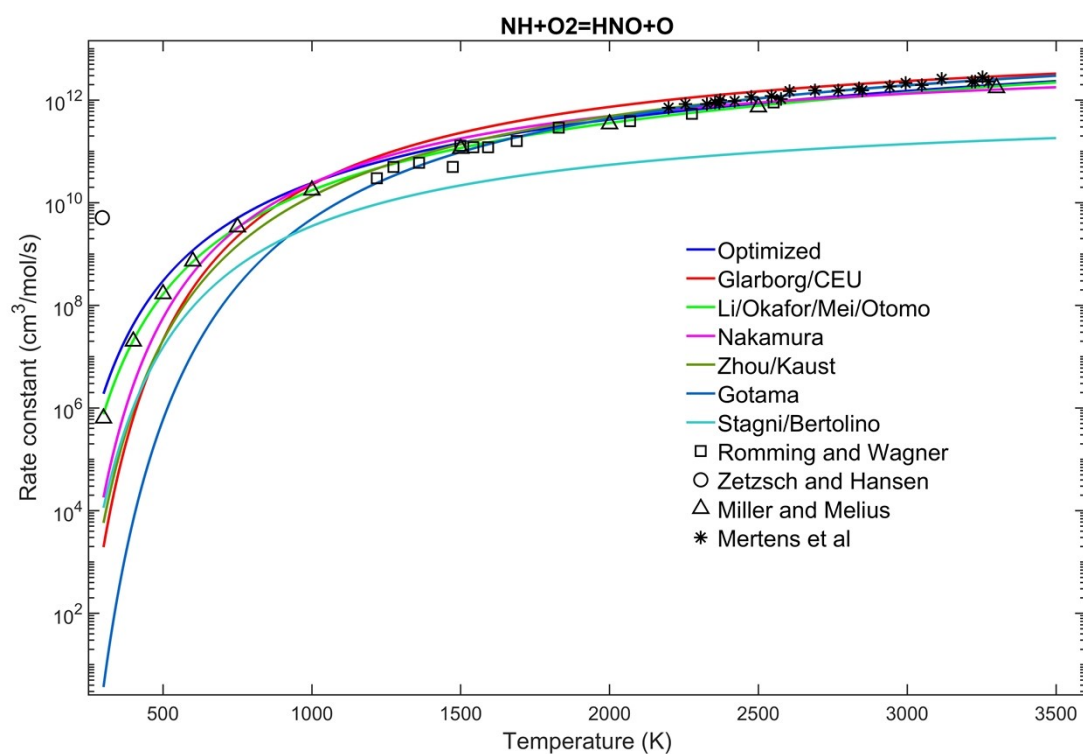

Figure S7. Rate constant of  $\text{NH}+\text{O}_2=\text{HNO}+\text{O}$  predicted using the investigated models and the experimental data of Römning and Wagner [28], Zetzsch and Hansen [29], Miller and Melius [30] and Mertens et al. [31].

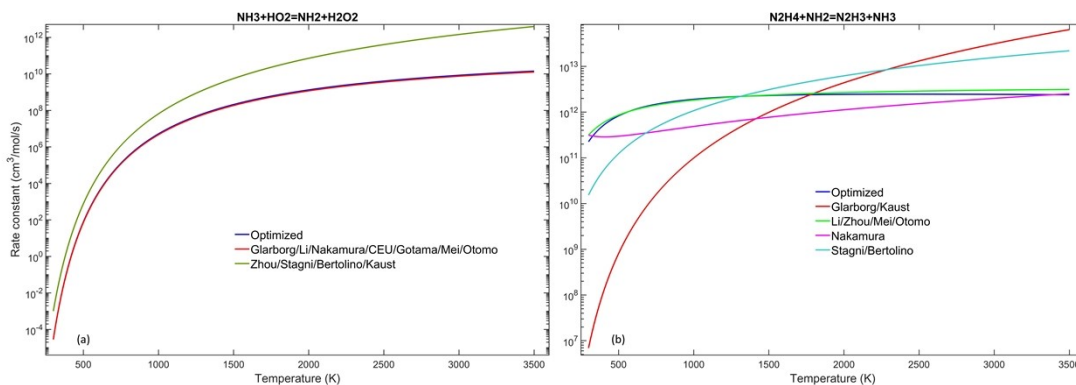

Figure S8. Rate constant of (a)  $\text{NH}_3+\text{HO}_2=\text{NH}_2+\text{H}_2\text{O}_2$  and (b)  $\text{N}_2\text{H}_4+\text{NH}_2=\text{N}_2\text{H}_3+\text{NH}_3$  predicted using the investigated models.

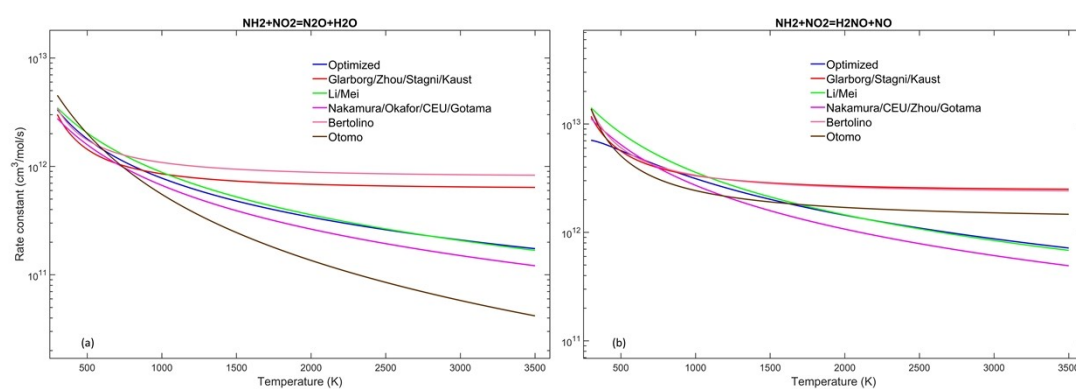

Figure S9. Rate constant of (a)  $\text{NH}_2+\text{NO}_2=\text{N}_2\text{O}+\text{H}_2\text{O}$  and (b)  $\text{NH}_2+\text{NO}_2=\text{H}_2\text{NO}+\text{NO}$  predicted using the investigated models.

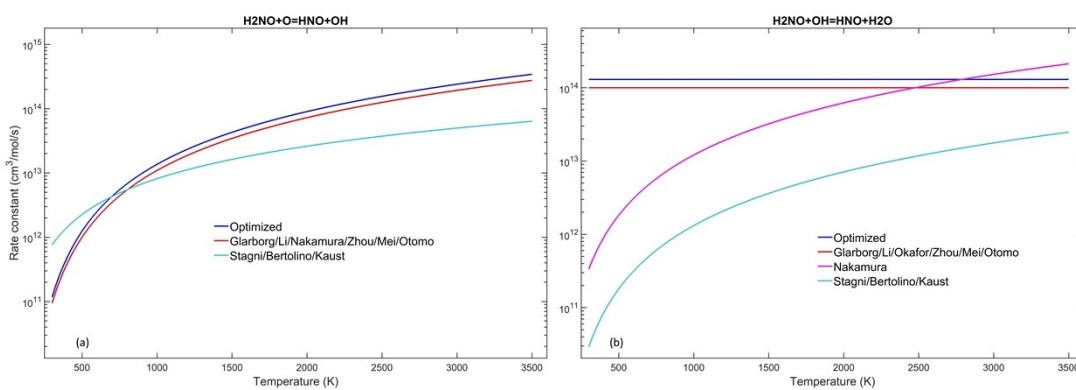

Figure S10. Rate constant of (a)  $\text{H}_2\text{NO}+\text{O}=\text{HNO}+\text{OH}$  and (b)  $\text{H}_2\text{NO}+\text{OH}=\text{HNO}+\text{H}_2\text{O}$  predicted using the investigated models.

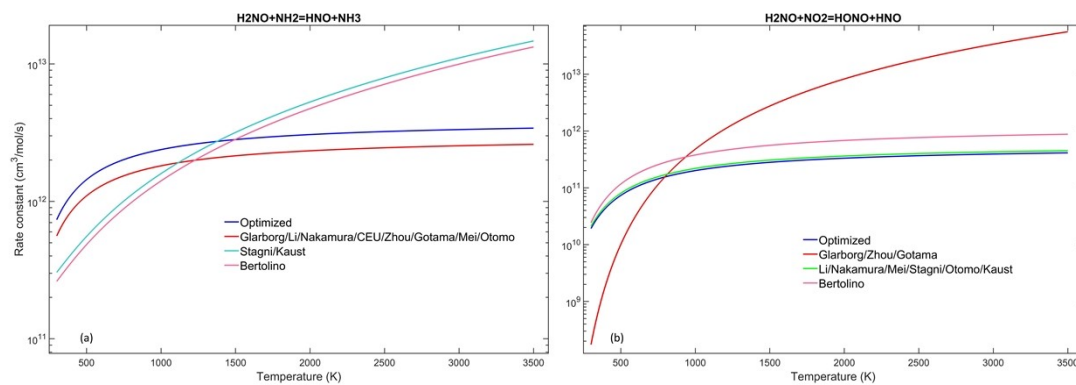

Figure S11. Rate constant of (a)  $\text{H}_2\text{NO}+\text{NH}_2=\text{HNO}+\text{NH}_3$  and (b)  $\text{H}_2\text{NO}+\text{NO}_2=\text{HONO}+\text{HNO}$  predicted using the investigated models.

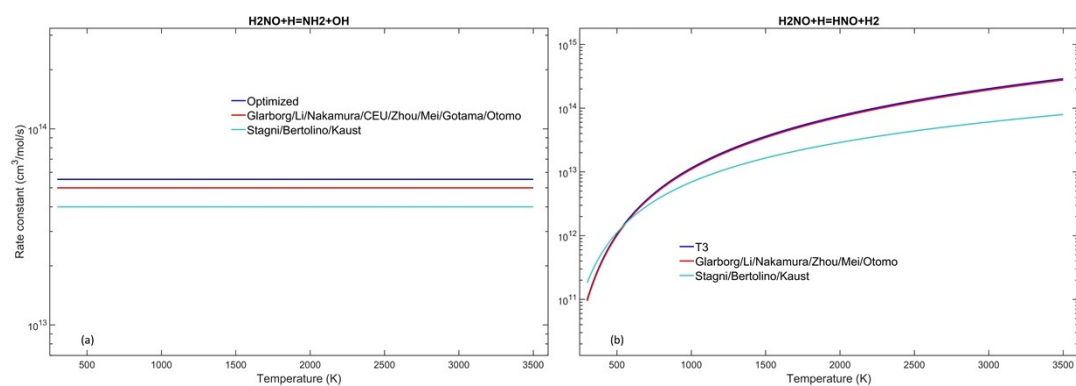

Figure S12. Rate constant of (a)  $\text{H}_2\text{NO}+\text{H}=\text{NH}_2+\text{OH}$  and (b)  $\text{H}_2\text{NO}+\text{H}=\text{HNO}+\text{H}_2$  predicted using the investigated models.

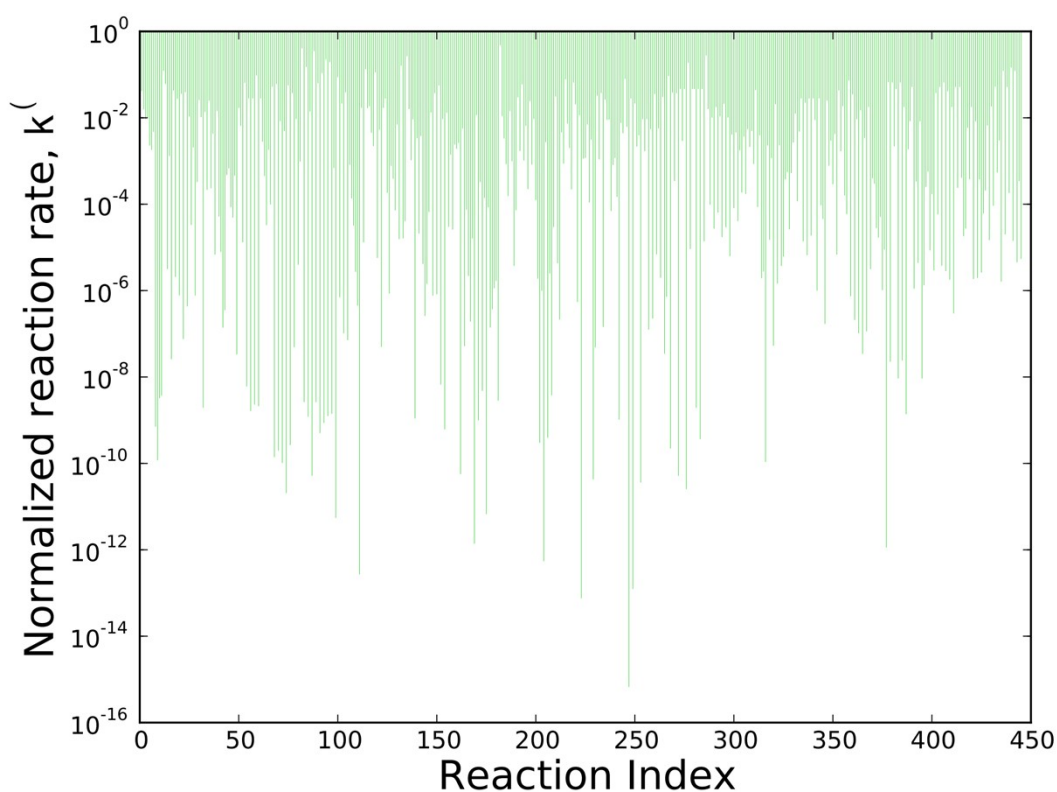

Figure S13. Distribution of normalized reaction rate of reactions in the optimized model. Reaction rates are calculated separately for forward and reverse directions for reversible reactions. Values smaller than 1 indicate no violation of collision limit.

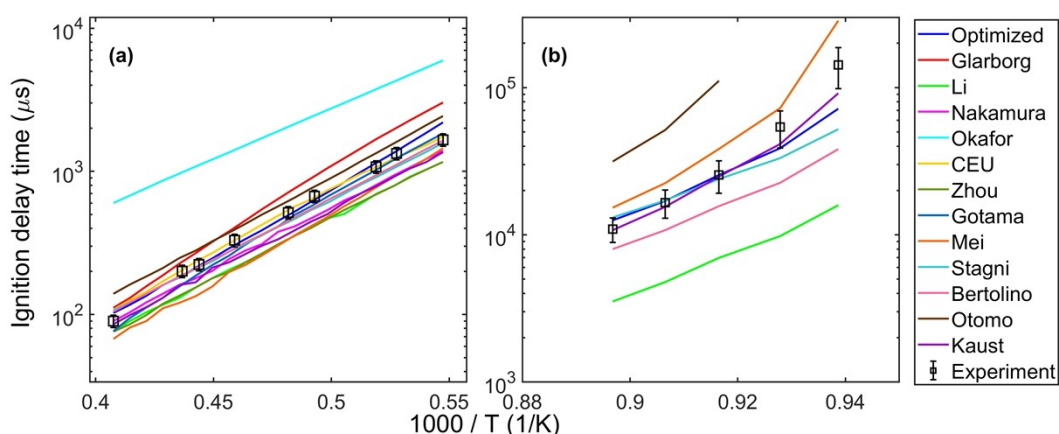

Figures S14. Simulation results for the ignition delay time measurements reported by (a) Mathieu and Petersen [32] and (b) He et al. [33] using the investigated models. The experimental and simulation condition in (a) is stoichiometric  $\text{NH}_3/\text{O}_2$  mixtures diluted in 98% Ar at 1.4 atm. The experimental and simulation condition in (b) is  $\text{NH}_3/\text{O}_2/\text{Ar}=0.12/0.18/0.7$  mixtures at 40 bar after compression.

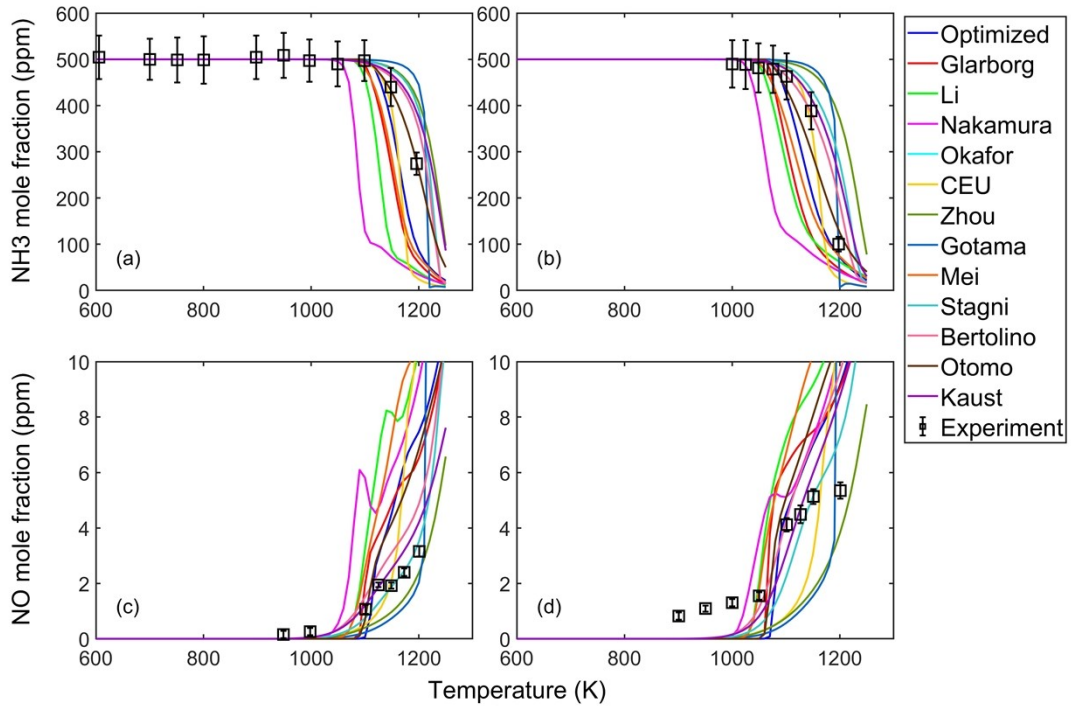

Figure S15. Simulation results of the  $\text{NH}_3$  and  $\text{NO}$  data measured by Stagni et al. [34]. The experimental conditions are (a) and (c) 500 ppm  $\text{NH}_3$  and 2%  $\text{O}_2$  diluted in He at 800 torr, (b) and (d) 500 ppm  $\text{NH}_3$  and 4%  $\text{O}_2$  diluted in He at 800 torr. The residence time is 1.5s for all cases.

**Table S1.** Ammonia ignition delay time experiments used in the current study.

| Number of measurement s                                                     | Mixture                                                  | Equivalence ratio | Pressure (atm) | Temperature (K) | Uncertainty |
|-----------------------------------------------------------------------------|----------------------------------------------------------|-------------------|----------------|-----------------|-------------|
| Mathieu et al. (2015) [32]; ignition criterial: $d[\text{OH}^*]/dt$ maximum |                                                          |                   |                |                 |             |
| 104                                                                         | $\text{NH}_3/\text{O}_2/\text{Ar}$                       | 0.5-2.0           | 1.25-30.4      | 1564-2489       | 10%         |
| Shu et al. (2019) [35]; ignition criteria: $dP/dt$ maximum                  |                                                          |                   |                |                 |             |
| 30                                                                          | $\text{NH}_3/\text{air}$                                 | 0.5-2.0           | 15.9-41.6      | 1181-1581       | 20%         |
| Chen et al. (2021) [36]; ignition criteria: $d[\text{OH}^*]/dt$ maximum     |                                                          |                   |                |                 |             |
| 66                                                                          | $\text{NH}_3/\text{H}_2/\text{O}_2/\text{Ar}$            | 1                 | 1.01-12.6      | 1022-1956.9     | 20%         |
| He et al. (2019) [33]; ignition criteria: $dP/dt$ maximum                   |                                                          |                   |                |                 |             |
| 84                                                                          | $\text{NH}_3/\text{H}_2/\text{O}_2/\text{Ar}/\text{N}_2$ | 0.5-2.0           | 19.5-59.8      | 969.4-1130.6    | 15%-55%     |
| Dai et al. (2020) [37]; ignition criteria: $dP/dt$ maximum                  |                                                          |                   |                |                 |             |
| 88                                                                          | $\text{NH}_3/\text{H}_2/\text{O}_2/\text{Ar}/\text{N}_2$ | 0.5-3.0           | 19.5-72.6      | 955.5-1205      | 8.8%-25.2%  |

**Table S2.** Ammonia laminar flame speed experiments used in the current study.

| Number of measurement s      | Fuel                      | Diluent      | Equivalence ratio | Temperature (atm) | Pressure (K) | Uncertainty |
|------------------------------|---------------------------|--------------|-------------------|-------------------|--------------|-------------|
| Lhuillier et al. (2020) [38] |                           |              |                   |                   |              |             |
| 265                          | $\text{NH}_3, \text{H}_2$ | $\text{N}_2$ | 0.8-1.4           | 298-473           | 0.99         | 10.8%-      |



|                             |                                       |                |           |         |           |            |
|-----------------------------|---------------------------------------|----------------|-----------|---------|-----------|------------|
|                             |                                       |                |           |         |           | 68.2%      |
| Ronney (1988) [39]          |                                       |                |           |         |           |            |
| 71                          | NH <sub>3</sub>                       | N <sub>2</sub> | 0.7-1.65  | 298     | 0.06-1.97 | 15%        |
| Han et al. (20169) [40]     |                                       |                |           |         |           |            |
| 216                         | NH <sub>3</sub> , H <sub>2</sub> , CO | N <sub>2</sub> | 0.7-1.7   | 298     | 1         | 1%-33.3%   |
| Han et al. (2020) [41]      |                                       |                |           |         |           |            |
| 172                         | NH <sub>3</sub> , H <sub>2</sub> , CO | N <sub>2</sub> | 0.7-1.6   | 298     | 1         | 1%-10.8%   |
| Mei et al. (2021) [42]      |                                       |                |           |         |           |            |
| 9                           | NH <sub>3</sub>                       | NO             | 1.1-1.9   | 298     | 1         | 7.2%-10.5% |
| Takizawa et al. (2008) [43] |                                       |                |           |         |           |            |
| 7                           | NH <sub>3</sub>                       | N <sub>2</sub> | 0.9-1.2   | 298     | 1.05      | 25%        |
| Ichikawa et al. (2015) [44] |                                       |                |           |         |           |            |
| 21                          | NH <sub>3</sub> , H <sub>2</sub>      | N <sub>2</sub> | 1.0       | 298     | 0.99-4.93 | 15%        |
| Hayakawa et al. (2015) [45] |                                       |                |           |         |           |            |
| 13                          | NH <sub>3</sub>                       | N <sub>2</sub> | 0.8-1.2   | 298     | 0.99-4.93 | 3%-24.2%   |
| Pfahl et al. (2000) [46]    |                                       |                |           |         |           |            |
| 46                          | NH <sub>3</sub> , H <sub>2</sub>      | N <sub>2</sub> | 0.44-4.5  | 298     | 0.09-0.61 | 15%        |
| Mei et al. (2020) [47]      |                                       |                |           |         |           |            |
| 100                         | NH <sub>3</sub> , H <sub>2</sub> , CO | N <sub>2</sub> | 0.7-1.5   | 298     | 1-10      | 2.7%-10.2% |
| Liu et al. (2019) [48]      |                                       |                |           |         |           |            |
| 24                          | NH <sub>3</sub>                       | N/A            | 0.5-1.75  | 298     | 0.5-1.6   | 20%        |
| Mei et al. (2019) [49]      |                                       |                |           |         |           |            |
| 51                          | NH <sub>3</sub>                       | N <sub>2</sub> | 0.6-1.5   | 298     | 1-5       | 3%-15.5%   |
| Wang et al. (2020) [50]     |                                       |                |           |         |           |            |
| 51                          | NH <sub>3</sub>                       | N <sub>2</sub> | 0.6-1.4   | 303-393 | 0.99      | 6.9%-15.9% |
| Wang et al. (2020) [51]     |                                       |                |           |         |           |            |
| 289                         | NH <sub>3</sub> , H <sub>2</sub> , CO | N <sub>2</sub> | 0.6-1.6   | 298     | 0.99-4.9  | 1.5%-15.2% |
| Lee et al. (2010) [52]      |                                       |                |           |         |           |            |
| 10                          | NH <sub>3</sub> , H <sub>2</sub>      | N <sub>2</sub> | 0.62-0.73 | 298     | 1         | 15%        |
| Li et al. (2014) [53]       |                                       |                |           |         |           |            |
| 66                          | NH <sub>3</sub> , H <sub>2</sub>      | N <sub>2</sub> | 0.6-1.37  | 298     | 1         | 20%        |

**Table S3.** List of the influential reactions and their estimated uncertainty function  $f(T)$ .

| Reaction                                   | $f(T)$                                                                  | Estimation approach                      | Source |
|--------------------------------------------|-------------------------------------------------------------------------|------------------------------------------|--------|
| HNO+OH=NO+H <sub>2</sub> O                 | 0.48 between 300 K and 3000 K                                           | Based on review literature               | [54]   |
| HNO+O <sub>2</sub> =HO <sub>2</sub> +NO    | 0.5 between 300 K and 3000 K                                            | Based on Bertolino rules                 | [55]   |
| NO+H(+M)=HNO+M                             | 0.5 at 400 K, increasing to 0.55 at 900 K, increasing to 1.00 at 2000 K | Based on uncertainty quantification work | [56]   |
| N <sub>2</sub> O(+M)=N <sub>2</sub> +O(+M) | 1 at 700 K, decreasing to 0.75 at 1200 K, increasing to 1 at 3200 K     | Based on uncertainty quantification work | [56]   |
| N <sub>2</sub> O+H=N <sub>2</sub> +OH      | 1.60 at 500 K, decreasing to 0.70                                       | Based on uncertainty                     | [56]   |

|                                                                        |                                                                                                      |                                                  |         |
|------------------------------------------------------------------------|------------------------------------------------------------------------------------------------------|--------------------------------------------------|---------|
|                                                                        | at 1200 K, increasing to 0.60 at 2600 K                                                              | quantification work                              |         |
| $\text{NH}_2+\text{H}(+\text{M})=\text{NH}_3(+\text{M})$               | 0.4 between 2000 K and 3000 K                                                                        | Based on review literature                       | [57]    |
| $\text{NH}_3+\text{H}=\text{NH}_2+\text{H}_2$                          | 1.2 at 400 K, increasing to 0.9 at 650 K, decreasing to 0.45 at 1500 K, increasing to 0.9 at 2500 K  | Based on experimental measurements (see Fig. S2) | [17-22] |
| $\text{NH}_3+\text{HO}_2=\text{NH}_2+\text{H}_2\text{O}_2$             | 0.7 between 300 K and 3000 K                                                                         | Based on domain knowledge                        | [58]    |
| $\text{NH}_2+\text{H}=\text{NH}+\text{H}_2$                            | 0.15 at 300 K, increasing to 0.9 at 800 K, decreasing to 0.15 at 1700 K, increasing to 0.3 at 2800 K | Based on experimental measurements (see Fig. S3) | [23-27] |
| $\text{NH}_2+\text{O}=\text{HNO}+\text{H}$                             | 0.7 between 300 K and 3000 K                                                                         | Based on domain knowledge                        | [59]    |
| $\text{NH}_2+\text{HO}_2=\text{H}_2\text{NO}+\text{OH}$                | 1.0 between 300 K and 3000 K                                                                         | Based on Bertolino rules                         | [60]    |
| $\text{NH}_2+\text{O}_2=\text{H}_2\text{NO}+\text{O}$                  | 0.3 between 300 K and 3000 K                                                                         | Based on Bertolino rules                         | [61]    |
| $\text{NH}_2+\text{NH}=\text{N}_2\text{H}_2+\text{H}$                  | 0.7 between 300 K and 3000 K                                                                         | Based on Bertolino rules                         | [62]    |
| $\text{NH}_2+\text{NO}=\text{N}_2+\text{H}_2\text{O}$                  | 0.3 between 298 K and 1200 K, increasing to 0.5 between 2000 K and 3300 K                            | Based on review literature                       | [57]    |
| $\text{NH}_2+\text{NO}=\text{NNH}+\text{OH}$                           | 0.3 between 298 K and 1200 K, increasing to 0.5 between 2000 K and 3300 K                            | Based on review literature                       | [57]    |
| $\text{NH}_2+\text{HONO}=\text{NH}_3+\text{NO}_2$                      | 0.7 between 300 K and 3000 K                                                                         | Based on Bertolino rules                         | [63]    |
| $\text{NH}_2+\text{NO}_2=\text{N}_2\text{O}+\text{H}_2\text{O}$        | 0.7 between 300 K and 3000 K                                                                         | Based on domain knowledge                        | [64]    |
| $\text{NH}_2+\text{NO}_2=\text{H}_2\text{NO}+\text{NO}$                | 0.7 between 300 K and 3000 K                                                                         | Based on domain knowledge                        | [64]    |
| $\text{NH}+\text{O}_2=\text{HNO}+\text{O}$                             | 0.7 between 300 K and 3000 K                                                                         | Based on domain knowledge                        | [30]    |
| $\text{NH}+\text{NO}=\text{N}_2\text{O}+\text{H}$                      | 0.3 between 300 K and 3000 K                                                                         | Based on Bertolino rules                         | [61]    |
| $\text{N}+\text{NO}=\text{N}_2+\text{O}$                               | 0.2 between 300 K and 3000 K                                                                         | Based on review literature                       | [65]    |
| $\text{NH}_2+\text{NH}_2(+\text{M})=\text{N}_2\text{H}_4(+\text{M})$   | 0.3 between 300 K and 3000 K                                                                         | Based on Bertolino rules                         | [66]    |
| $\text{N}_2\text{H}_4+\text{NH}_2=\text{N}_2\text{H}_3+\text{NH}_3$    | 0.7 between 300 K and 3000 K                                                                         | Based on domain knowledge                        | [59]    |
| $\text{N}_2\text{H}_3+\text{M}=\text{N}_2\text{H}_2+\text{H}+\text{M}$ | 0.5 between 300 K and 3000 K                                                                         | Based on Bertolino rules                         | [55]    |
| $\text{N}_2\text{H}_3+\text{HO}_2=\text{N}_2\text{H}_4+\text{O}_2$     | 0.5 between 300 K and 3000 K                                                                         | Based on Bertolino rules                         | [55]    |
| $\text{N}_2\text{H}_3+\text{NH}_2=\text{H}_2\text{NN}+\text{NH}_3$     | 0.5 between 300 K and 3000 K                                                                         | Based on Bertolino rules                         | [55]    |
| $\text{N}_2\text{H}_2+\text{M}=\text{NNH}+\text{H}+\text{M}$           | 0.7 between 300 K and 3000 K                                                                         | Based on Bertolino rules                         | [62]    |
| $\text{N}_2\text{H}_2+\text{H}=\text{NNH}+\text{H}_2$                  | 0.7 between 300 K and 3000 K                                                                         | Based on Bertolino                               | [62]    |

|                         |                              | rules                     |      |
|-------------------------|------------------------------|---------------------------|------|
| $N_2H_2+NO=N_2O+NH_2$   | 0.5 between 300 K and 3000 K | Based on Bertolino rules  | [55] |
| $NH_2+NH_2=N_2H_2+H_2$  | 0.3 between 300 K and 3000 K | Based on Bertolino rules  | [66] |
| $H_2NN=N_2+H_2$         | 0.5 between 300 K and 3000 K | Based on Bertolino rules  | [55] |
| $H_2NN+O_2=NH_2+NO_2$   | 0.5 between 300 K and 3000 K | Based on Bertolino rules  | [55] |
| $H_2NO+HO_2=HNO+H_2O_2$ | 0.5 between 300 K and 3000 K | Based on Bertolino rules  | [55] |
| $H_2NO+O_2=HNO+HO_2$    | 0.6 between 300 K and 3000 K | Based on Bertolino rules  | [67] |
| $HNOH+NH_2=H_2NN+H_2O$  | 0.5 between 300 K and 3000 K | Based on Bertolino rules  | [55] |
| $H_2NO+NH_2=HNO+NH_3$   | 0.7 between 300 K and 3000 K | Based on domain knowledge | [68] |
| $H_2NO+H=HNO+H_2$       | 0.7 between 300 K and 3000 K | Based on domain knowledge | [68] |
| $H_2NO+H=NH_2+OH$       | 0.7 between 300 K and 3000 K | Based on domain knowledge | [68] |
| $H_2NO+O=HNO+OH$        | 0.7 between 300 K and 3000 K | Based on domain knowledge | [68] |
| $H_2NO+OH=HNO+H_2O$     | 0.7 between 300 K and 3000 K | Based on domain knowledge | [68] |
| $H_2NO+NO_2=HONO+HNO$   | 0.7 between 300 K and 3000 K | Based on domain knowledge | [68] |

\*Uncertainty factor was interpreted as a piece-wise linear function between the reported temperature nodes and a constant outside the reported temperature range

## References

- [1] Salimian S, Hanson R, Kruger C. High temperature study of the reactions of O and OH with NH<sub>3</sub>. International journal of chemical kinetics. 1984;16(6):725-39.
- [2] Gehring M, Hoyermann K, Schacke H, Wolfrum J, editors. Direct studies of some elementary steps for the formation and destruction of nitric oxide in the H- N- O system. Symposium (International) on Combustion; 1973: Elsevier.
- [3] Silver JA, Kolb CE. Rate constant for the reaction NH<sub>3</sub>+ OH→ NH<sub>2</sub>+ H<sub>2</sub>O over a wide temperature range. Chemical Physics Letters. 1980;75(1):191-5.
- [4] Stuhl F. Absolute rate constant for the reaction OH+ NH<sub>3</sub>→ NH<sub>2</sub>+ H<sub>2</sub>O. The Journal of Chemical Physics. 1973;59(2):635-7.
- [5] Zellner R, Smith IW. Rate constants for the reactions of OH with NH<sub>3</sub> and HNO<sub>3</sub>. Chemical Physics Letters. 1974;26(1):72-4.
- [6] Zabielski M, Seery D. High temperature measurements of the rate of the reaction of OH with NH<sub>3</sub>. International journal of chemical kinetics. 1985;17(11):1191-9.
- [7] Perry R, Atkinson R, Pitts J. Rate constants for the reactions OH [thin space (1/6-em)]+[thin space (1/6-em)] H<sub>2</sub>S [thin space (1/6-em)]→[thin space (1/6-em)] H<sub>2</sub>O [thin space (1/6-em)]+[thin space (1/6-em)] HS and OH [thin space (1/6-em)]+[thin space (1/6-em)] NH<sub>3</sub> [thin space (1/6-em)]→[thin space (1/6-em)] H<sub>2</sub>O [thin space (1/6-em)]+[thin space (1/6-em)] NH<sub>2</sub> over the temperature range 297–427 K. J Phys Chem. 1976;64:3237-9.

- [8] Kistiakowsky G, Volpi GG. Reactions of nitrogen atoms. I. Oxygen and oxides of nitrogen. The Journal of Chemical Physics. 1957;27(5):1141-9.
- [9] Kaufman F, Decker L, editors. Effect of oxygen on thermal decomposition of nitric oxide at high temperatures. Symposium (International) on Combustion; 1958: Elsevier.
- [10] Clyne M, Thrush BA. Mechanism of chemiluminescent combination reactions involving oxygen atoms. Proceedings of the Royal Society of London Series A Mathematical and Physical Sciences. 1962;269(1338):404-18.
- [11] Vlastaras AS, Winkler C. Reaction of active nitrogen with oxygen. Canadian Journal of Chemistry. 1967;45(22):2837-40.
- [12] Wilson W. Rate constant for the reaction  $N + O_2 \rightarrow NO + O$ . The Journal of Chemical Physics. 1967;46(5):2017-8.
- [13] Westenberg A, Roscoe J, DeHaas N. Rate measurements on  $N + O(2)((1) \Delta(g)) \rightarrow NO + O$  and  $H + O(2)((1) \Delta(g)) \rightarrow OH + O$ . CHEMICAL PHYSICS LETTERS. 1970;7(6):597-9.
- [14] Livesey J, Roberts A, Williams A. The formation of oxides of nitrogen in some oxy-propane flames. Combustion Science and Technology. 1971;4(1):9-15.
- [15] Barnett AJ, Marston G, Wayne RP. Kinetics and chemiluminescence in the reaction of N atoms with  $O_2$  and  $O_3$ . Journal of the Chemical Society, Faraday Transactions 2: Molecular and Chemical Physics. 1987;83(8):1453-63.
- [16] Fernandez A, Goumri A, Fontijn A. Kinetics of the reactions of N(4S) atoms with  $O_2$  and  $CO_2$  over wide temperatures ranges. The Journal of Physical Chemistry A. 1998;102(1):168-72.
- [17] Yumura M, Asaba T, editors. Rate constants of chemical reactions in the high temperature pyrolysis of ammonia. Symposium (International) on Combustion; 1981: Elsevier.
- [18] Michael J, Sutherland J, Klemm R. Rate constant for the reaction, atomic hydrogen+ ammonia, over the temperature range, 750-1777 K. The Journal of Physical Chemistry. 1986;90(3):497-500.
- [19] Hack W, Rouveirolles P, Wagner HG. Direct measurements of the reactions amidogen+ molecular hydrogen. ammonia+ atomic hydrogen at temperatures from 670 to 1000 K. The Journal of Physical Chemistry. 1986;90(11):2505-11.
- [20] Corchado J, Espinosa-Garcia J. Analytical potential energy surface for the  $NH_3 + H \leftrightarrow NH_2 + H_2$  reaction: application of variational transition-state theory and analysis of the equilibrium constants and kinetic isotope effects using curvilinear and rectilinear coordinates. The Journal of chemical physics. 1997;106(10):4013-21.
- [21] Marshall P, Fontijn A. An HTP kinetics study of the reaction between ground - state H atoms and  $NH_3$  from 500 to 1140 K. The Journal of chemical physics. 1986;85(5):2637-43.
- [22] Ko T, Marshall P, Fontijn A. Rate coefficients for the hydrogen atom+ ammonia reaction over a wide temperature range. Journal of Physical Chemistry. 1990;94(4):1401-4.
- [23] Röhrig M, Wagner HG, editors. The reactions of NH(X $3\Sigma^-$ ) with the water gas components  $CO_2$ ,  $H_2O$ , and  $H_2$ . Symposium (International) on Combustion; 1994: Elsevier.
- [24] Dove JE, Nip WS. A shock-tube study of ammonia pyrolysis. Canadian Journal of Chemistry. 1979;57(6):689-701.
- [25] Davidson DF, Kohse - Höinghaus K, Chang AY, Hanson RK. A pyrolysis mechanism for ammonia. International journal of chemical kinetics. 1990;22(5):513-35.
- [26] Bahng M-K, Macdonald RG. Determination of the Rate Constants for the Radical- Radical Reactions  $NH_2(X^2B_1) + NH(X^3\Sigma^-)$  and  $NH_2(X^2B_1) + H(2S)$  at 293 K. The Journal of Physical Chemistry A. 2009;113(11):2415-23.

- [27] Fontijn A, Shamsuddin SM, Crammond D, Marshall P, Anderson WR. Kinetics of the NH reaction with H<sub>2</sub> and reassessment of HNO formation from NH + CO<sub>2</sub>, H<sub>2</sub>O. *Combustion and flame*. 2006;145(3):543-51.
- [28] Römning H-J, Wagner HG, editors. A kinetic study of the reactions of NH (X<sub>3</sub>Σ<sup>-</sup>) with O<sub>2</sub> and NO in the temperature range from 1200 to 2200 K. *Symposium (International) on Combustion*; 1996: Elsevier.
- [29] Zetzsch C, Hansen I. Rate Constant for the Reaction of NH (X<sub>3</sub>Σ<sup>-</sup>) with O<sub>2</sub> Determined by Pulsed Vacuum UV Photolysis of NH<sub>3</sub> and Resonance Fluorescence Detection of NH. *Berichte der Bunsengesellschaft für physikalische Chemie*. 1978;82(8):830-3.
- [30] Miller JA, Melius CF, editors. The reactions of imidogen with nitric oxide and molecular oxygen. *Symposium (International) on Combustion*; 1992: Elsevier.
- [31] Mertens JD, Chang AY, Hanson RK, Bowman CT. A shock tube study of the reactions of NH with NO, O<sub>2</sub>, and O. *International journal of chemical kinetics*. 1991;23(2):173-96.
- [32] Mathieu O, Petersen EL. Experimental and modeling study on the high-temperature oxidation of Ammonia and related NO<sub>x</sub> chemistry. *Combustion and flame*. 2015;162(3):554-70.
- [33] He X, Shu B, Nascimento D, Moshhammer K, Costa M, Fernandes R. Auto-ignition kinetics of ammonia and ammonia/hydrogen mixtures at intermediate temperatures and high pressures. *Combustion and Flame*. 2019;206:189-200.
- [34] Stagni A, Cavallotti C, Arunthanayothin S, Song Y, Herbinet O, Battin-Leclerc F, et al. An experimental, theoretical and kinetic-modeling study of the gas-phase oxidation of ammonia. *Reaction Chemistry & Engineering*. 2020;5(4):696-711.
- [35] Shu B, Vallabhuni S, He X, Issayev G, Moshhammer K, Farooq A, et al. A shock tube and modeling study on the autoignition properties of ammonia at intermediate temperatures. *Proceedings of the Combustion Institute*. 2019;37(1):205-11.
- [36] Chen J, Jiang X, Qin X, Huang Z. Effect of hydrogen blending on the high temperature auto-ignition of ammonia at elevated pressure. *Fuel*. 2021;287:119563.
- [37] Dai L, Gersen S, Glarborg P, Levinsky H, Mokhov A. Experimental and numerical analysis of the autoignition behavior of NH<sub>3</sub> and NH<sub>3</sub>/H<sub>2</sub> mixtures at high pressure. *Combustion and Flame*. 2020;215:134-44.
- [38] Lhuillier C, Brequigny P, Lamoureux N, Contino F, Mounaïm-Rousselle C. Experimental investigation on laminar burning velocities of ammonia/hydrogen/air mixtures at elevated temperatures. *Fuel*. 2020;263:116653.
- [39] Ronney PD. Effect of chemistry and transport properties on near-limit flames at microgravity. *Combustion Science and Technology*. 1988;59(1-3):123-41.
- [40] Han X, Wang Z, Costa M, Sun Z, He Y, Cen K. Experimental and kinetic modeling study of laminar burning velocities of NH<sub>3</sub>/air, NH<sub>3</sub>/H<sub>2</sub>/air, NH<sub>3</sub>/CO/air and NH<sub>3</sub>/CH<sub>4</sub>/air premixed flames. *Combustion and Flame*. 2019;206:214-26.
- [41] Han X, Wang Z, He Y, Zhu Y, Cen K. Experimental and kinetic modeling study of laminar burning velocities of NH<sub>3</sub>/syngas/air premixed flames. *Combustion and Flame*. 2020;213:1-13.
- [42] Mei B, Ma S, Zhang X, Li Y. Characterizing ammonia and nitric oxide interaction with outwardly propagating spherical flame method. *Proceedings of the Combustion Institute*. 2021;38(2):2477-85.
- [43] Takizawa K, Takahashi A, Tokuhashi K, Kondo S, Sekiya A. Burning velocity measurements of nitrogen-containing compounds. *Journal of hazardous materials*. 2008;155(1-2):144-52.
- [44] Ichikawa A, Hayakawa A, Kitagawa Y, Somarathne KKA, Kudo T, Kobayashi H. Laminar burning

velocity and Markstein length of ammonia/hydrogen/air premixed flames at elevated pressures. *International journal of hydrogen energy*. 2015;40(30):9570-8.

[45] Hayakawa A, Goto T, Mimoto R, Arakawa Y, Kudo T, Kobayashi H. Laminar burning velocity and Markstein length of ammonia/air premixed flames at various pressures. *Fuel*. 2015;159:98-106.

[46] Pfahl U, Ross M, Shepherd J, Pasamehmetoglu K, Unal C. Flammability limits, ignition energy, and flame speeds in H<sub>2</sub>-CH<sub>4</sub>-NH<sub>3</sub>-N<sub>2</sub>O-O<sub>2</sub>-N<sub>2</sub> mixtures. *Combustion and flame*. 2000;123(1-2):140-58.

[47] Mei B, Ma S, Zhang Y, Zhang X, Li W, Li Y. Exploration on laminar flame propagation of ammonia and syngas mixtures up to 10 atm. *Combustion and Flame*. 2020;220:368-77.

[48] Liu Q, Chen X, Huang J, Shen Y, Zhang Y, Liu Z. The characteristics of flame propagation in ammonia/oxygen mixtures. *Journal of hazardous materials*. 2019;363:187-96.

[49] Mei B, Zhang X, Ma S, Cui M, Guo H, Cao Z, et al. Experimental and kinetic modeling investigation on the laminar flame propagation of ammonia under oxygen enrichment and elevated pressure conditions. *Combustion and Flame*. 2019;210:236-46.

[50] Wang D, Ji C, Wang Z, Wang S, Zhang T, Yang J. Measurement of oxy-ammonia laminar burning velocity at normal and elevated temperatures. *Fuel*. 2020;279:118425.

[51] Wang S, Wang Z, Elbaz AM, Han X, He Y, Costa M, et al. Experimental study and kinetic analysis of the laminar burning velocity of NH<sub>3</sub>/syngas/air, NH<sub>3</sub>/CO/air and NH<sub>3</sub>/H<sub>2</sub>/air premixed flames at elevated pressures. *Combustion and Flame*. 2020;221:270-87.

[52] Lee J, Kim J, Park J, Kwon O. Studies on properties of laminar premixed hydrogen-added ammonia/air flames for hydrogen production. *international journal of hydrogen energy*. 2010;35(3):1054-64.

[53] Li J, Huang H, Kobayashi N, He Z, Nagai Y. Study on using hydrogen and ammonia as fuels: Combustion characteristics and NO<sub>x</sub> formation. *International journal of energy research*. 2014;38(9):1214-23.

[54] Tsang W, Herron JT. Chemical kinetic data base for propellant combustion I. Reactions involving NO, NO<sub>2</sub>, HNO, HNO<sub>2</sub>, HCN and N<sub>2</sub>O. *Journal of physical and chemical reference data*. 1991;20(4):609-63.

[55] Dean AM, Bozzelli JW. Combustion chemistry of nitrogen. *Gas-phase combustion chemistry*: Springer; 2000. p. 125-341.

[56] Kovács M, Papp M, Zsély IG, Turányi T. Determination of rate parameters of key N/H/O elementary reactions based on H<sub>2</sub>/O<sub>2</sub>/NO<sub>x</sub> combustion experiments. *Fuel*. 2020;264:116720.

[57] Baulch D, Bowman CT, Cobos CJ, Cox RA, Just T, Kerr J, et al. Evaluated kinetic data for combustion modeling: supplement II. *Journal of physical and chemical reference data*. 2005;34(3):757-1397.

[58] Miller JA, Bowman CT. Kinetic modeling of the reduction of nitric oxide in combustion products by isocyanic acid. *International Journal of Chemical Kinetics*. 1991;23(4):289-313.

[59] Miller JA, Smooke MD, Green RM, Kee RJ. Kinetic modeling of the oxidation of ammonia in flames. *Combustion Science and Technology*. 1983;34(1-6):149-76.

[60] Sumathi R, Peyerimhoff S. A quantum statistical analysis of the rate constant for the HO<sub>2</sub>+ NH<sub>2</sub> reaction. *Chemical physics letters*. 1996;263(6):742-8.

[61] Klippenstein SJ, Harding LB, Glarborg P, Miller JA. The role of NNH in NO formation and control. *Combustion and Flame*. 2011;158(4):774-89.

[62] Marshall P, Rawling G, Glarborg P. New reactions of diazene and related species for modelling combustion of amine fuels. *Molecular Physics*. 2021;119(17-18):e1979674.

- [63] Mebel A, Diau E, Lin M-C, Morokuma K. Theoretical Rate Constants for the  $\text{NH}_3 + \text{NO}_x \rightarrow \text{NH}_2 + \text{HNO}_x$  ( $x = 1, 2$ ) Reactions by ab Initio MO/VTST Calculations. *The Journal of Physical Chemistry*. 1996;100(18):7517-25.
- [64] Miller JA, Glarborg P. Modeling the thermal De - NO<sub>x</sub> process: Closing in on a final solution. *International Journal of Chemical Kinetics*. 1999;31(11):757-65.
- [65] Baulch D, Cobos C, Cox R, Frank P, Hayman G, Just T, et al. Evaluated kinetic data for combustion modeling. Supplement I. *Journal of Physical and Chemical Reference Data*. 1994;23(6):847-8.
- [66] Klippenstein SJ, Harding L, Ruscic B, Sivaramakrishnan R, Srinivasan N, Su M-C, et al. Thermal decomposition of  $\text{NH}_2\text{OH}$  and subsequent reactions: ab initio transition state theory and reflected shock tube experiments. *The Journal of Physical Chemistry A*. 2009;113(38):10241-59.
- [67] Song Y, Hashemi H, Christensen JM, Zou C, Marshall P, Glarborg P. Ammonia oxidation at high pressure and intermediate temperatures. *Fuel*. 2016;181:358-65.
- [68] Glarborg P, Dam - Johansen K, Miller JA, Kee RJ, Coltrin ME. Modeling the thermal DENOX process in flow reactors. Surface effects and nitrous oxide formation. *International Journal of Chemical Kinetics*. 1994;26(4):421-36.
